# Supplementary material for: A low-self-discharge high-loading polysulfide cathode design for lithium–sulfur cells
Source: Royal Society of Chemistry journal article supplement (doi:10.1039/d3ta05632e), 2023-01-01
Supplement: d3ta05632e1.pdf [file d3ta05632e1.pdf]

## Electronic Supplementary Information

A Low-Self-Discharge High-Loading Polysulfide Cathode Design for Lithium–Sulfur Cells

Cheng-Che Wu<sup>‡a</sup>, Yun-Chung Ho<sup>‡a</sup> and Sheng-Heng Chung<sup>\*ab</sup>

<sup>a</sup> Department of Materials Science and Engineering, National Cheng Kung University, No.1 University Road, Tainan City 70101, Taiwan

<sup>b</sup> Hierarchical Green-Energy Materials Research Center, National Cheng Kung University, No.1 University Road, Tainan City 70101, Taiwan

<sup>‡</sup>Equal contribution

\*Sheng-Heng Chung: [SHChung@gs.ncku.edu.tw](mailto:SHChung@gs.ncku.edu.tw)

## Supporting Figures

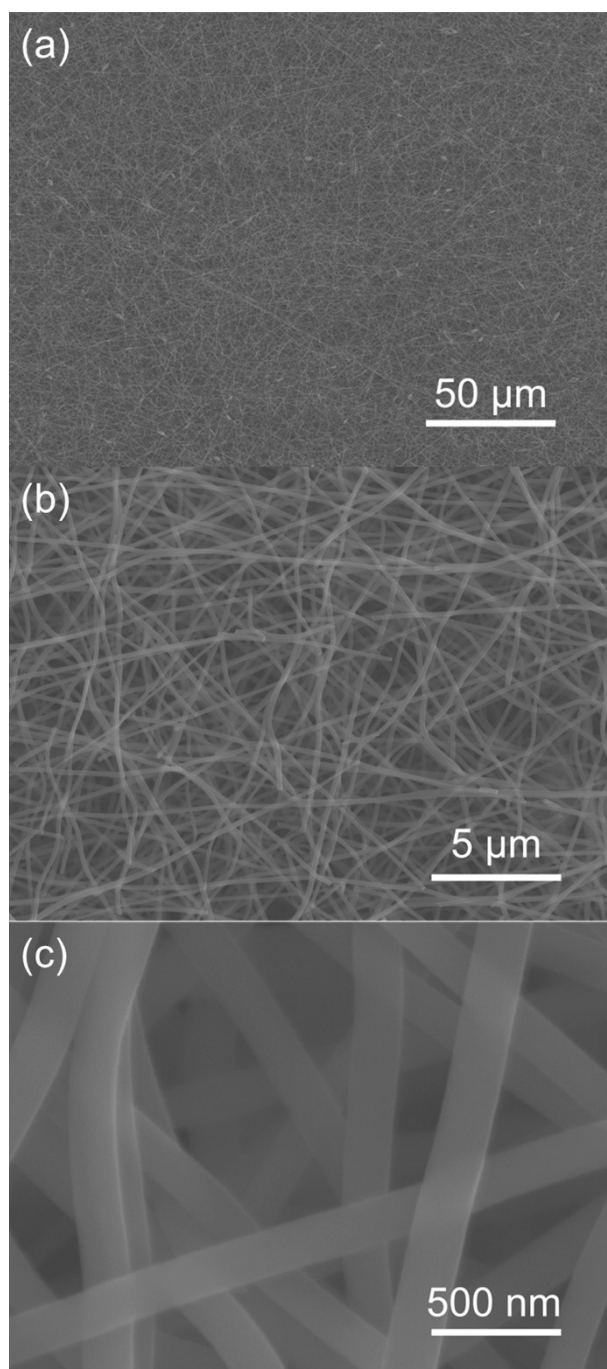

**Fig. S1.** SEM morphological observation of carbonized electrospun substrate (cPAN) at various magnifications.

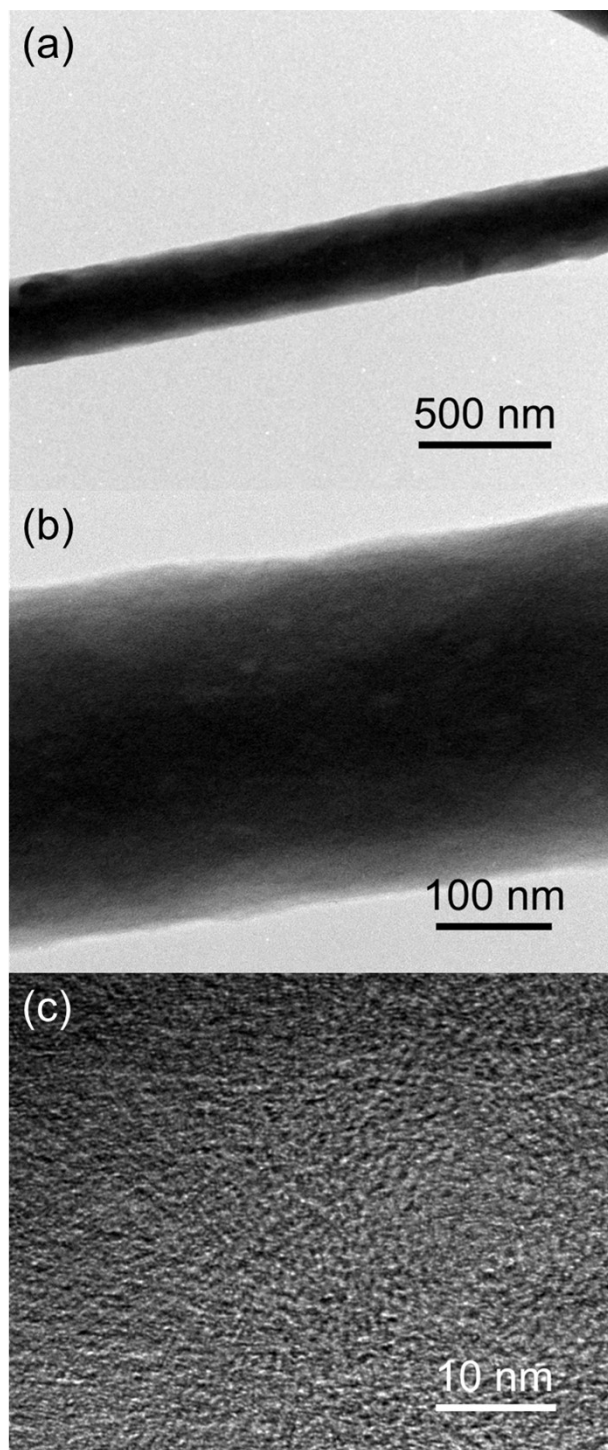

**Fig. S2.** TEM microstructural observation of carbonized electrospun substrate (cPAN) at various magnifications.

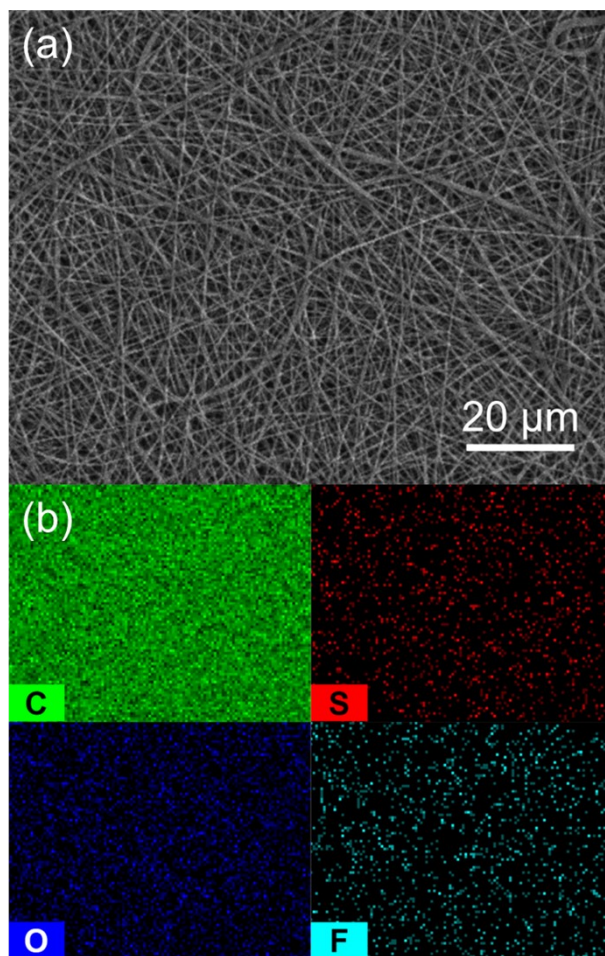

**Fig. S3.** SEM/EDS elemental mapping of carbonized electrospun substrate (cPAN) at low magnification.

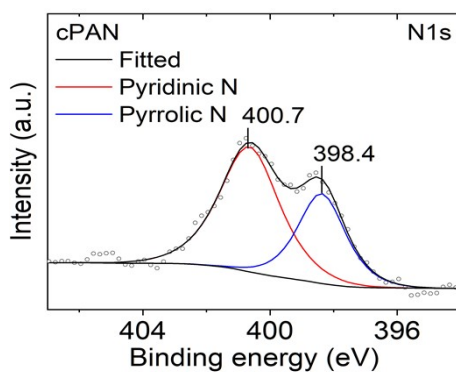

**Fig. S4.** Deconvolution of N1s spectra of the XPS analysis of carbonized electrospun substrate (cPAN).

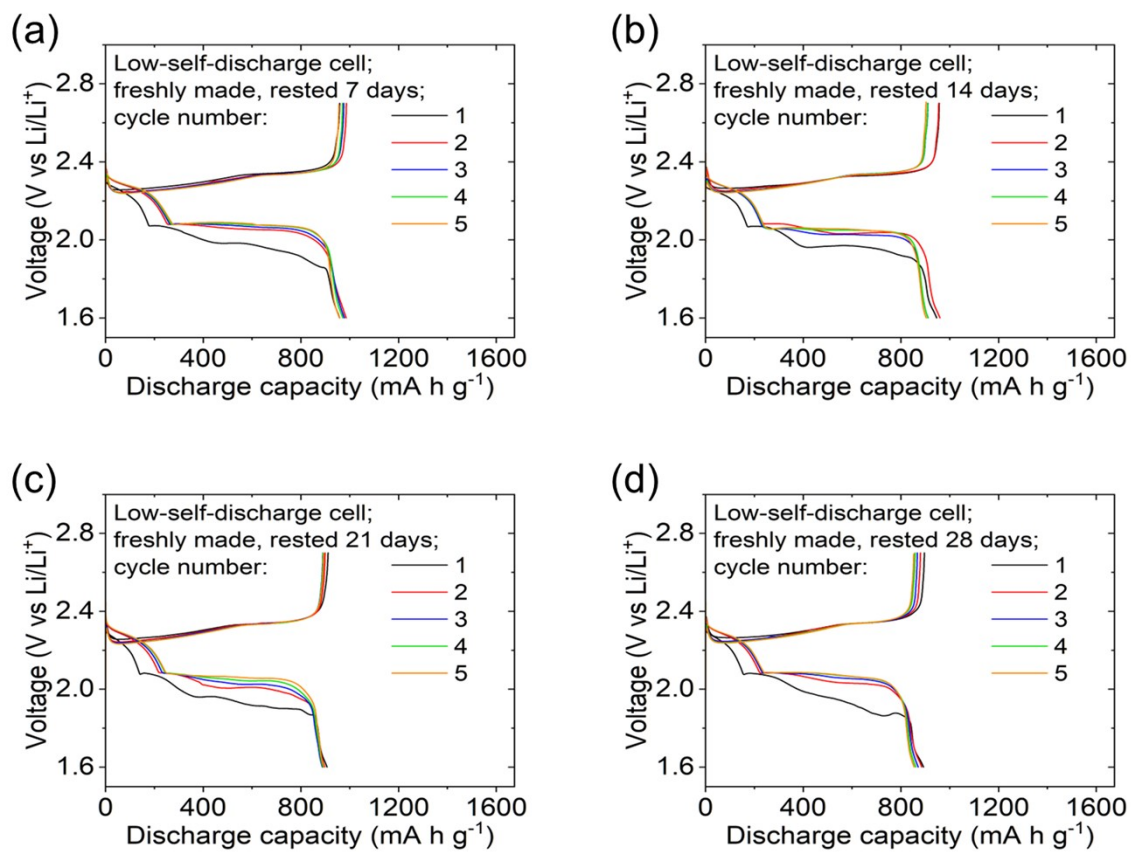

**Fig. S5.** Charge–discharge voltage profiles of the freshly made cells after resting for (a) 7, (b) 14, (c) 21, and (d) 28 days.

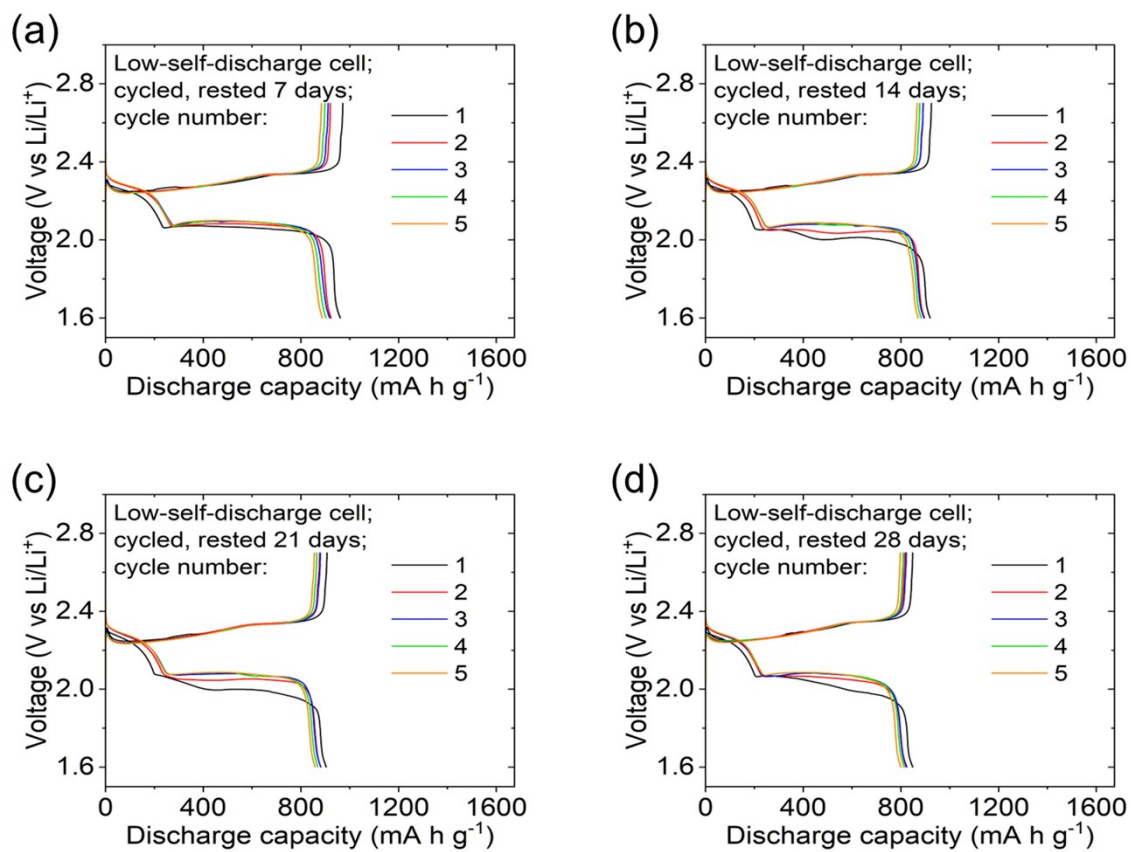

**Fig. S6.** Charge–discharge voltage profiles of the cycled cells after resting for (a) 7, (b) 14, (c) 21, and (d) 28 days.

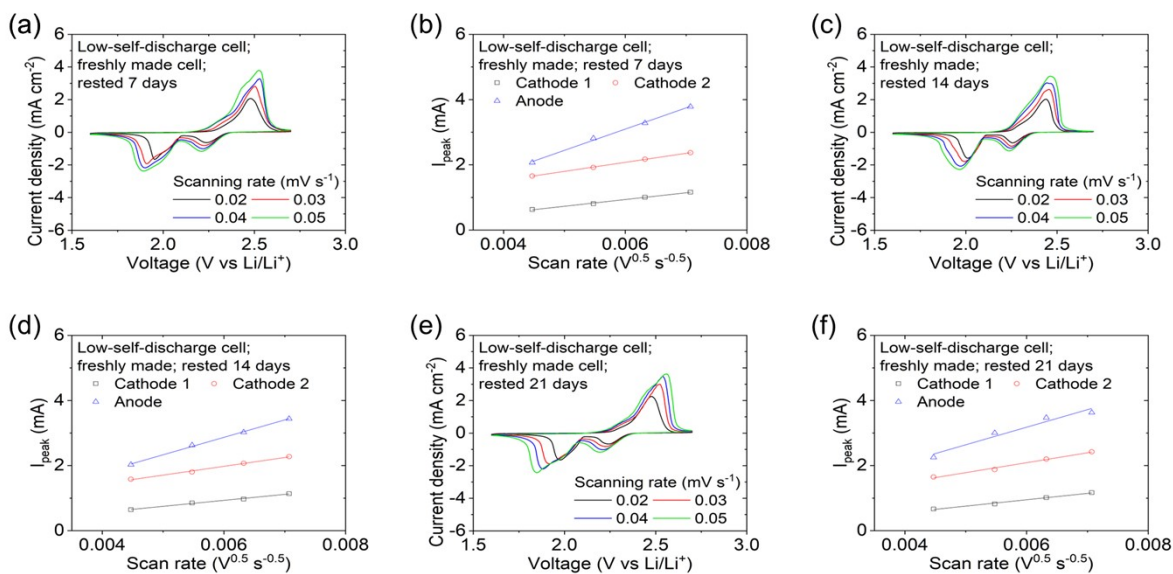

**Fig. S7.** Cyclic voltammetry (CV) curves and lithium-ion diffusion coefficients of the freshly made cells after resting for (a,b) 7, (c,d) 14, and (e,f) 21 days.

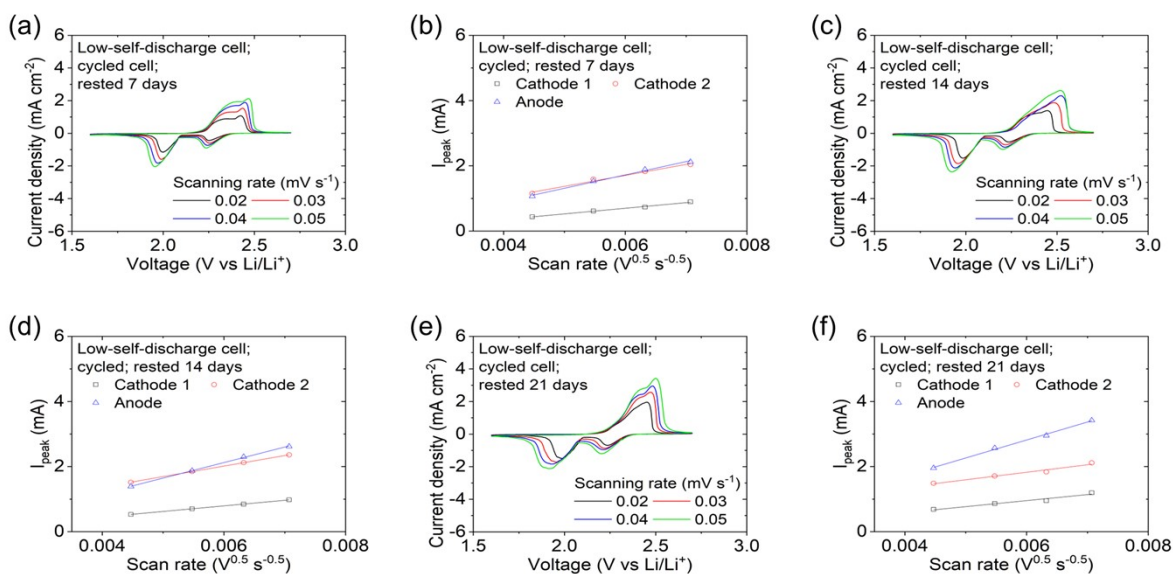

**Fig. S8.** Cyclic voltammetry (CV) curves and lithium-ion diffusion coefficients of the cycled cells after resting for (a,b) 7, (c,d) 14, and (e,f) 21 days.

## Supporting Tables

**Table S1.** Lithium-ion diffusion coefficients of the low-self-discharge cells at various static and dynamic storage times for 7, 14, 21, and 28 days.

| Cell condition              | $C_1$ ( $\text{cm}^2 \text{s}^{-1}$ ) | $C_2$ ( $\text{cm}^2 \text{s}^{-1}$ ) | $A$ ( $\text{cm}^2 \text{s}^{-1}$ ) |
|-----------------------------|---------------------------------------|---------------------------------------|-------------------------------------|
| freshly made reference cell | $2.4 \times 10^{-8}$                  | $6.4 \times 10^{-8}$                  | $2.2 \times 10^{-7}$                |
| cycled reference cell       | $1.3 \times 10^{-8}$                  | $3.0 \times 10^{-8}$                  | $2.4 \times 10^{-7}$                |
| 7 days static storage       | $2.2 \times 10^{-8}$                  | $3.9 \times 10^{-8}$                  | $2.1 \times 10^{-7}$                |
| 7 days dynamic storage      | $1.5 \times 10^{-8}$                  | $5.7 \times 10^{-8}$                  | $8.4 \times 10^{-8}$                |
| 14 days static storage      | $1.7 \times 10^{-8}$                  | $3.7 \times 10^{-8}$                  | $1.5 \times 10^{-7}$                |
| 14 days dynamic storage     | $1.5 \times 10^{-8}$                  | $5.3 \times 10^{-8}$                  | $1.2 \times 10^{-7}$                |
| 21 days static storage      | $1.9 \times 10^{-8}$                  | $4.7 \times 10^{-8}$                  | $1.5 \times 10^{-7}$                |
| 21 days dynamic storage     | $1.7 \times 10^{-8}$                  | $2.7 \times 10^{-8}$                  | $1.5 \times 10^{-7}$                |
| 28 days static storage      | $2.2 \times 10^{-8}$                  | $8.2 \times 10^{-8}$                  | $1.3 \times 10^{-7}$                |
| 28 days dynamic storage     | $1.5 \times 10^{-8}$                  | $4.6 \times 10^{-8}$                  | $1.1 \times 10^{-7}$                |

**Table S2.** Self-discharge performance of various lithium–sulfur cells.

| Sulfur loading ( $\text{mg cm}^{-2}$ ) | Sulfur content (wt%) | Electrolyte-to-sulfur ratio ( $\mu\text{L mg}^{-1}$ ) | Resting time (day) | Capacity-retention rate (%) | Time-dependent capacity-fade rate (% per day) | Cycle rate (C) | Battery status     | year | Ref. |
|----------------------------------------|----------------------|-------------------------------------------------------|--------------------|-----------------------------|-----------------------------------------------|----------------|--------------------|------|------|
| 0.90                                   | 64.0                 | n/a                                                   | 7                  | 96.10                       | 0.56                                          | 0.2            | fresh, charged     | 2017 | S1   |
| 1.00                                   | 56.0                 | 30                                                    | 10                 | 70.00                       | 3.00                                          | 0.1            | cycled, charged    | 2017 | S2   |
| 2.00                                   | 50.0                 | n/a                                                   | 3                  | 97.53                       | 0.82                                          | 0.2            | cycled, discharged | 2017 | S3   |
| 1.00                                   | n/a                  | n/a                                                   | 4                  | 90.60                       | 2.35                                          | 1              | cycled, discharged | 2017 | S4   |
| 3.10                                   | 62.4                 | 8                                                     | 1                  | 94.16                       | 5.84                                          | 0.1            | cycled, charged    | 2018 | S5   |
| 5.20                                   | 62.4                 | 8                                                     | 1                  | 93.89                       | 6.11                                          | 0.1            | cycled, charged    | 2018 | S5   |
| 6.50                                   | 62.4                 | 8                                                     | 1                  | 89.80                       | 10.20                                         | 0.1            | cycled, charged    | 2018 | S5   |
| 1.50                                   | 56.0                 | gel                                                   | 3                  | 90.70                       | 3.10                                          | 0.1            | cycled, charged    | 2018 | S6   |
| 1.20                                   | 70.0                 | 22                                                    | 3                  | 91.20                       | 2.93                                          | 0.5            | cycled,            | 2018 | S7   |



|      |      |      |      |       |       |      |                                     |      |     |
|------|------|------|------|-------|-------|------|-------------------------------------|------|-----|
| 1.20 | 70.0 | 22   | 3    | 87.70 | 4.10  | 0.5  | discharged<br>cycled,<br>discharged | 2018 | S7  |
| 1.00 | 57.8 | n/a  | 7    | 91.00 | 1.29  | 0.2  | cycled,<br>charged                  | 2018 | S8  |
| 1.40 | 50.0 | 25   | 3    | 84.40 | 5.20  | 0.2  | cycled,<br>charged                  | 2018 | S9  |
| 0.50 | 50.4 | 500  | 1.67 | 98.50 | 0.90  | 0.1  | fresh,<br>charged                   | 2018 | S10 |
| 1.80 | 72.0 | 22   | 3    | 95.10 | 1.63  | n/a  | cycled,<br>charged                  | 2018 | S11 |
| 1.00 | 60.0 | 40   | 3    | 90.90 | 3.03  | 2    | cycled,<br>discharged               | 2019 | S12 |
| 1.20 | 56.0 | 25   | 4    | 92.80 | 1.80  | 0.2  | cycled,<br>charged                  | 2019 | S13 |
| 8.60 | 70.0 | 9    | 30   | 90.00 | 0.33  | 0.1  | cycled,<br>discharge                | 2019 | S14 |
| 1.50 | 41.3 | 18   | 10   | 93.60 | 0.64  | 0.05 | cycled,<br>charged                  | 2019 | S15 |
| 1.40 | 64.0 | 32   | 2    | 86.40 | 6.80  | 0.1  | cycled,<br>charged                  | 2019 | S16 |
| 2.30 | 70.0 | 15   | 60   | 95.80 | 0.07  | 0.2  | cycled,<br>charged                  | 2019 | S17 |
| 3.70 | 70.0 | 15   | 60   | 98.20 | 0.03  | 0.2  | cycled,<br>charged                  | 2019 | S17 |
| 1.60 | 69.6 | 12.5 | 10   | 89.76 | 1.02  | 0.2  | fresh,<br>charged                   | 2019 | S18 |
| 1.60 | 69.6 | 12.5 | 30   | 64.85 | 1.17  | 0.2  | fresh,<br>charged                   | 2019 | S18 |
| 1.60 | 69.6 | 12.5 | 50   | 54.97 | 0.90  | 0.2  | fresh,<br>charged                   | 2019 | S18 |
| 1.50 | 60.0 | n/a  | 30   | 92.70 | 0.24  | 0.2  | cycled,<br>charged                  | 2019 | S19 |
| 1.30 | 64.0 | 15   | 3    | 94.30 | 1.90  | 0.5  | cycled,<br>discharged               | 2019 | S20 |
| 2.50 | 70.0 | 10   | 30   | 89.70 | 0.34  | 1    | cycled,<br>charged                  | 2020 | S21 |
| 1.50 | 75.0 | 70   | 0.17 | 94.72 | 31.06 | 0.5  | cycled,<br>charged                  | 2020 | S22 |
| 1.50 | 75.0 | 70   | 1    | 87.70 | 12.30 | 0.5  | cycled,<br>charged                  | 2020 | S22 |
| 4.74 | n/a  | n/a  | 20   | 98.31 | 0.08  | 0.5  | cycled,<br>charged                  | 2020 | S23 |
| 3.00 | 60.0 | 20   | 2    | 97.08 | 1.46  | 0.5  | cycled,<br>charged                  | 2020 | S24 |
| 3.00 | 70.0 | 15   | 20   | 85.70 | 0.72  | 1    | cycled,<br>charged                  | 2020 | S25 |
| 1.40 | 60.0 | n/a  | 2    | 94.80 | 2.60  | 0.2  | fresh,<br>charged                   | 2020 | S26 |
| 2.00 | 51.0 | 30   | 60   | 88.60 | 0.19  | n/a  | fresh,<br>charged                   | 2020 | S27 |
| 1.91 | n/a  | n/a  | 4    | 97.00 | 0.75  | 0.1  | cycled,<br>charged                  | 2020 | S28 |
| 4.00 | 75.0 | 10   | 4.17 | 88.40 | 2.78  | 0.1  | cycled,<br>charged                  | 2021 | S29 |
| 1.00 | 60.0 | 15   | 3    | 98.62 | 0.46  | 0.2  | cycled,<br>charged                  | 2021 | S30 |
| 1.50 | 56.0 | 15   | 5    | 91.80 | 1.64  | n/a  | cycled,<br>charged                  | 2021 | S31 |
| 1.00 | 56.0 | 35   | 12   | 88.66 | 0.94  | 1    | fresh,<br>charged                   | 2022 | S32 |

|      |      |      |    |       |      |     |                       |            |     |
|------|------|------|----|-------|------|-----|-----------------------|------------|-----|
| n/a  | 72.3 | n/a  | 2  | 90.85 | 4.58 | 0.2 | cycled,<br>charged    | 2022       | S33 |
| 1.00 | 56.0 | n/a  | 7  | 95.10 | 0.70 | 0.5 | cycled,<br>charged    | 2023       | S34 |
| 1.00 | 60.0 | 20   | 2  | 96.04 | 1.98 | 0.5 | cycled,<br>discharged | 2023       | S35 |
| 1.50 | 56.0 | 16.7 | 5  | 96.63 | 0.67 | n/a | fresh,<br>charged     | 2023       | S36 |
| 1.50 | 56.0 | 16.7 | 1  | 99.69 | 0.31 | n/a | cycled,<br>charged    | 2023       | S36 |
| 4.03 | 66.8 | 10   | 7  | 93.01 | 1.00 | 0.1 | fresh,<br>charged     | this paper |     |
| 4.03 | 66.8 | 10   | 14 | 91.84 | 0.58 | 0.1 | fresh,<br>charged     | this paper |     |
| 4.03 | 66.8 | 10   | 21 | 88.06 | 0.57 | 0.1 | fresh,<br>charged     | this paper |     |
| 4.03 | 66.8 | 10   | 28 | 86.60 | 0.48 | 0.1 | fresh,<br>charged     | this paper |     |
| 4.03 | 66.8 | 10   | 60 | 82.91 | 0.28 | 0.1 | fresh,<br>charged     | this paper |     |
| 4.03 | 66.8 | 10   | 90 | 76.80 | 0.26 | 0.1 | fresh,<br>charged     | this paper |     |

## Supporting References

- S01 Y. Pang, Y. Wen, W. Li, Y. Sun, T. Zhu, Y. Wang and Y. Xia, *J. Mater. Chem. A*, 2017, **5**, 17926-17932.
- S02 Z. Lin, X. Li, W. Huang, X. Zhu, Y. Wang and Z. Shan, *ChemElectroChem*, 2017, **4**, 2577-2582.
- S03 F. Liu, Q. Xiao, H. B. Wu, F. Sun, X. Liu, F. Li, Z. Le, L. Shen, G. Wang, M. Cai and Y. Lu, *ACS Nano*, 2017, **11**, 2697-2705.
- S04 X. Hong, J. Jin, T. Wu, Y. Lu, S. Zhang, C. Chen and Z. Wen, *J. Mater. Chem. A*, 2017, **5**, 14775-14782.
- S05 L. Ma, H. Lin, W. Zhang, P. Zhao, G. Zhu, Y. Hu, R. Chen, Z. Tie, J. Liu and Z. Jin, *Nano Lett.*, 2018, **18**, 7949-7954.
- S06 T. Chen, W. Kong, Z. Zhang, L. Wang, Y. Hu, G. Zhu, R. Chen, L. Ma, W. Yan, Y. Wang, J. Liu and Z. Jin, *Nano Energy*, 2018, **54**, 17-25.
- S07 K. Yang, L. Zhong, Y. Mo, R. Wen, M. Xiao, D. Han, S. Wang and Y. Meng, *ACS Appl. Energy Mater.*, 2018, **1**, 2555-2564.
- S08 L. Yan, N. Luo, W. Kong, S. Luo, H. Wu, K. Jiang, Q. Li, S. Fan, W. Duan and J. Wang, *J. Power Sources*, 2018, **389**, 169-177.
- S09 S. Suriyakumar, A. M. Stephan, N. Angulakshmi, M. H. Hassan and M. H. Alkordi, *J. Mater. Chem. A*, 2018, **6**, 14623-14632.
- S10 K. Yang, L. Zhong, R. Guan, M. Xiao, D. Han, S. Wang and Y. Meng, *Appl. Surf. Sci.*, 2018, **441**, 914-922.

- S11 Y. Ansari, S. Zhang, B. Wen, F. Fan and Y.-M. Chiang, *Adv. Energy Mater.*, 2019, **9**, 1802213.
- S12 B. Zheng, L. Yu, Y. Zhao and J. Xi, *Electrochim. Acta*, 2019, **295**, 910-917.
- S13 T. Chen, W. Kong, M. Fan, Z. Zhang, L. Wang, R. Chen, Y. Hu, J. Ma and Z. Jin, *J. Mater. Chem. A*, 2019, **7**, 20302-20309.
- S14 R. Yu, S.-H. Chung, C.-H. Chen and A. Manthiram, *Energy Storage Mater.*, 2019, **18**, 491-499.
- S15 S. Majumder, M. Shao, Y. Deng and G. Chen, *J. Power Sources*, 2019, **431**, 93-104.
- S16 L. Dong, J. Liu, D. Chen, Y. Han, Y. Liang, M. Yang, C. Yang and W. He, *ACS Nano*, 2019, **13**, 14172-14181.
- S17 Z. Ye, Y. Jiang, J. Qian, W. Li, T. Feng, L. Li, F. Wu and R. Chen, *Nano Energy*, 2019, **64**, 103965.
- S18 J.-X. Lin, Y.-X. Mo, P.-F. Zhang, Y.-Y. Li, Y.-J. Wu, S.-J. Zhang, Z.-G. Gao, J.-D. Chen, W.-F. Ren, J.-T. Li, Y. Zhou, L. Huang and S.-G. Sun, *Mater. Today Energy*, 2019, **13**, 267-276.
- S19 Z. Sun, X.-L. Wu, Z. Peng, J. Wang, S. Gan, Y. Zhang, D. Han and L. Niu, *Small*, 2019, **15**, 1902491.
- S20 Q. Zhao, K. Zhao, G. Ji, X. Guo, M. Han, J. Wen, Z. Ren, S. Zhao, Z. Gao, R. Wang, M. Li, K. Sun, N. Hu and C. Xu, *Chem. Eng. J.*, 2019, **361**, 1043-1052.
- S21 M. Waqas, Y. Han, D. Chen, S. Ali, C. Zhen, C. Feng, B. Yuan, J. Han and W. He, *Energy Storage Mater.*, 2020, **27**, 333-341.

- S22 C. Choi, D.-Y. Lee, J. B. Park and D.-W. Kim, *ACS Sustainable Chem. Eng.*, 2020, **8**, 15134-15148.
- S23 Z. Wu, S. Yao, R. Guo, Y. Li, C. Zhang, X. Shen, T. Li and S. Qin, *Int. J. Energy Res.*, 2020, **44**, 3110-3121.
- S24 Q. Hu, J. Lu, C. Yang, C. Zhang, J. Hu, S. Chang, H. Dong, C. Wu, Y. Hong and L. Zhang, *Small*, 2020, **16**, 2002046.
- S25 M. Waqas, A. Manzoor Soomro, S. Ali, S. Kumar, S. Chan, K. Hussain, F. Hussain Memon and S. Ahmed Shaikh, *ChemistrySelect*, 2020, **5**, 12009-12019.
- S26 D. Capková, M. Al máši, T. Kazda, O. Čech, N. Király, P. Čudek, A. S. Fedorková and V. Hornebecq, *Electrochim. Acta*, 2020, **354**, 136640.
- S27 C. Y. Zhang, G. W. Sun, Y. F. Bai, Z. Dai, Y. R. Zhao, X. P. Gao, G. Z. Sun, X. B. Pan, X. J. Pan and J. Y. Zhou, *J. Mater. Chem. A*, 2020, **8**, 18358-18366.
- S28 Y. Li, C. Wang, W. Wang, A. Y. S. Eng, M. Wan, L. Fu, E. Mao, G. Li, J. Tang, Z. W. Seh and Y. Sun, *ACS Nano*, 2020, **14**, 1148-1157.
- S29 J. Liu, X. Liu, Q. Zhang, X. Liang, J. Yan, H. H. Tan, Y. Yu and Y. Wu, *Electrochim. Acta*, 2021, **382**, 138267.
- S30 C. Zhang, R. Du, J. J. Biendicho, M. Yi, K. Xiao, D. Yang, T. Zhang, X. Wang, J. Arbiol, J. Llorca, Y. Zhou, J. R. Morante and A. Cabot, *Adv. Energy Mater.*, 2021, **11**, 2100432.
- S31 J. Liu, K. Li, Q. Zhang, X. Zhang, X. Liang, J. Yan, H. H. Tan, Y. Yu and Y. Wu, *ACS Appl. Mater. Interfaces*, 2021, **13**, 45547-45557.
- S32 S. Xiao, L. Huang, W. Lv and Y.-B. He, *ACS Appl. Mater. Interfaces*, 2022, **14**, 1783-1790.

- S33 S.-N. Xu, T. Zhao, L.-L. Wang, Y.-X. Huang, Y.-S. Ye, N.-X. Zhang, T. Feng, L. Li, F. Wu and R.-J. Chen, *J. Energy Chem.*, 2022, **67**, 423-431.
- S34 T. Nie, Y. Zhu, M. Fang, L. Ma, J. Xu, Y. Cao, S. Hu, X. Zhang and D. Niu, *J. Colloid Interface Sci.*, 2023, **640**, 908-916.
- S35 C. Dong, F. Liu, Y. Yang, H. Zhao, H. Huo, J. Zhou and L. Li, *ACS Appl. Energy Mater.*, 2023, **6**, 3894-3902.
- S36 Y.-H. Liu, L.-X. Li, A.-Y. Wen, F.-F. Cao and H. Ye, *Energy Storage Mater.*, 2023, **55**, 652-659.
